# Supplementary material for: Xylooligosaccharides ameliorate insulin resistance by increasing Akkermansia muciniphila and improving intestinal barrier dysfunction in gestational diabetes mellitus mice
Source: Royal Society of Chemistry journal article supplement (doi:10.1039/d3fo04681h), 2024-01-01
Supplement: d3fo04681h1.pdf [file d3fo04681h1.pdf]

## Raw Data for Western Blot Experiments

The total proteins from tissues of 9 mice in each group were extracted. When loading the samples for electrophoresis, a mixed sample of protein extracts from 3 mice were used. Therefore, there were 3 replicates of western blot experiments for each group. All raw pictures and analyzed data were shown in the following.

**1. Raw pictures for Fig.2I** (The representative pictures in Fig.2I were from the Western blot pictures in Replicate 3)

### Replicate 1

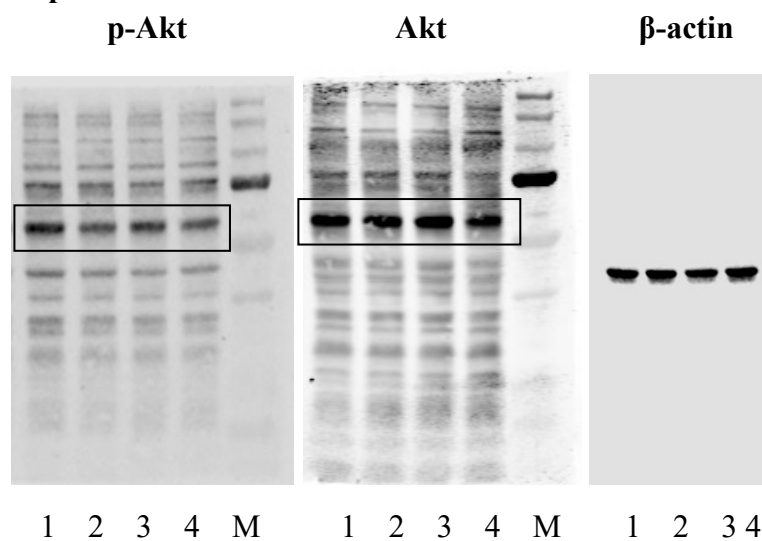

Note: 1, NC group; 2, HFD group; 3, GDM group; 4, GDM+XOS group; M, Marker

**Replicate 2 and 3** (These two replicates were ran in one Western blot gel. We did not use markers in order to save costs. It is easy to identify the bands of p-Akt and Akt in the gel based on the first time running of replicate 1 with marker.)

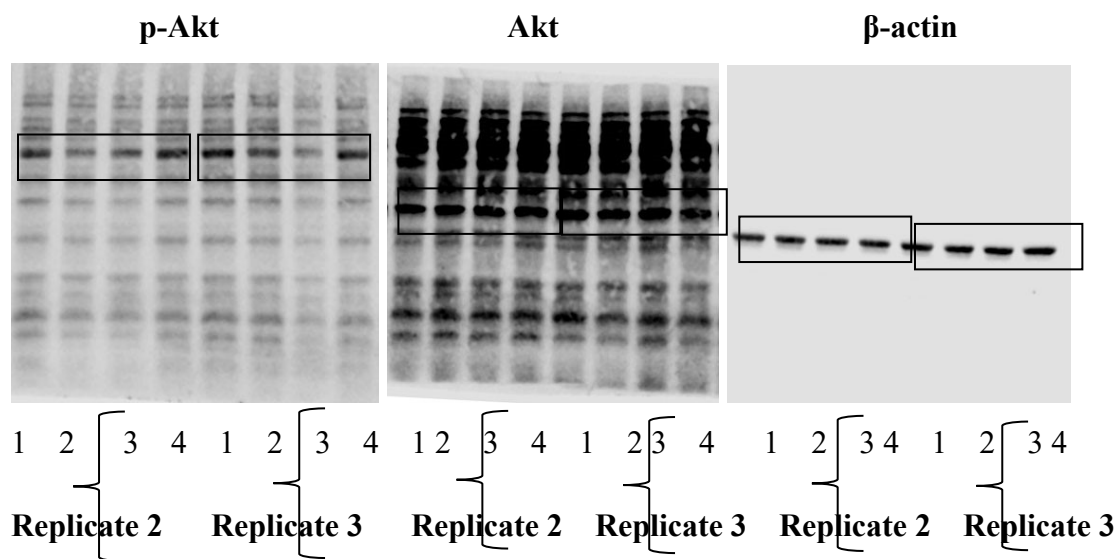

**Image J plots for western blot pictures**

**Replicate 1**

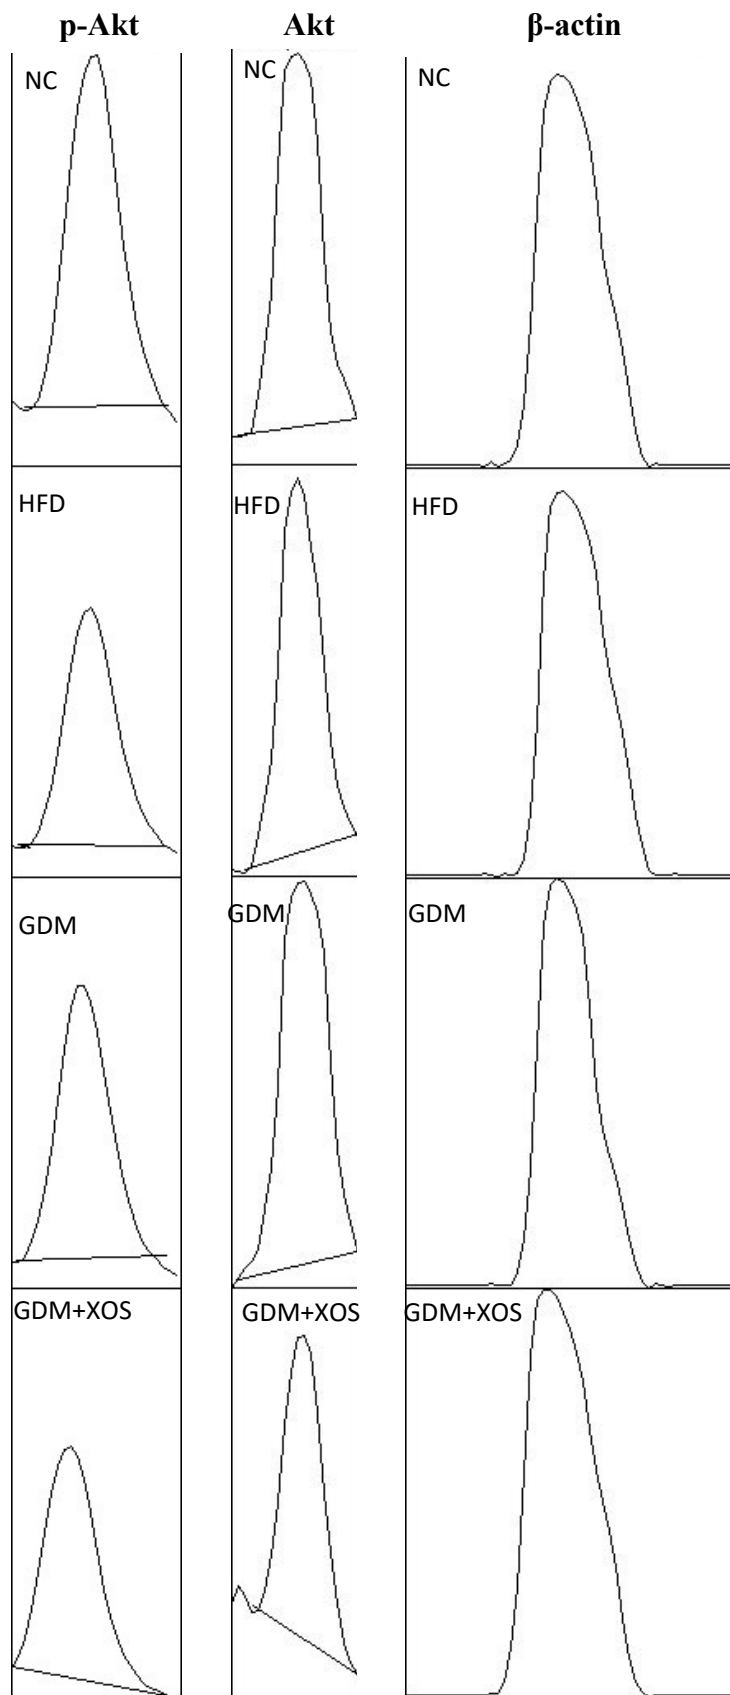

**Replicate 2 and 3**

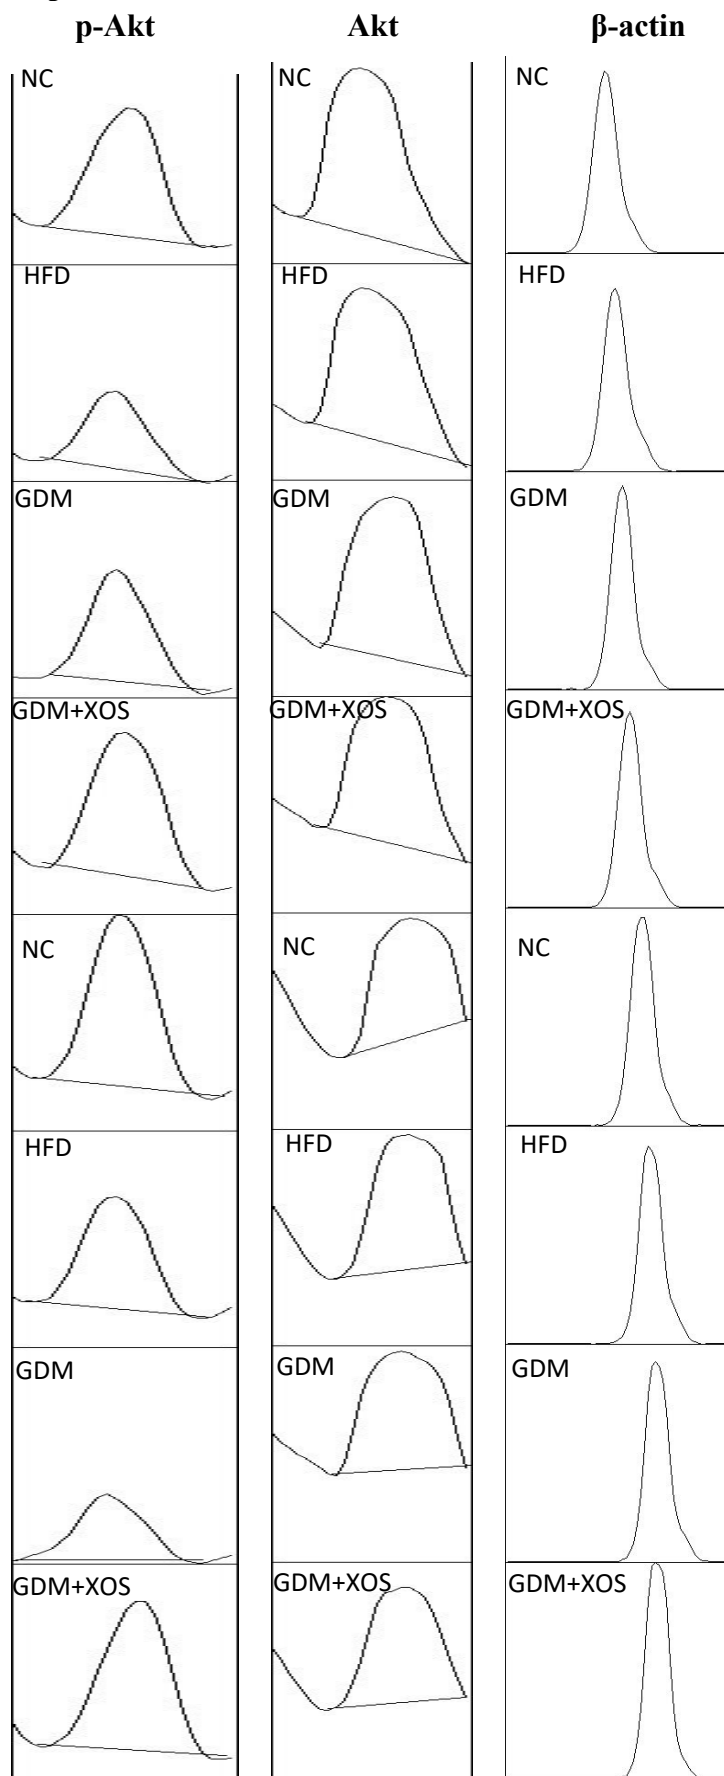

|             |         | Grey value produced by Image J software |          |                | Corrected value by $\beta$ -actin |                     |             | Relative ratio to the NC group |
|-------------|---------|-----------------------------------------|----------|----------------|-----------------------------------|---------------------|-------------|--------------------------------|
|             |         | p-Akt                                   | Akt      | $\beta$ -actin | p-Akt/ $\beta$ -actin             | Akt/ $\beta$ -actin | p-Akt/Akt   |                                |
| Replicate 1 | NC      | 7938.569                                | 7287.326 | 11038.518      | 0.71916982                        | 0.660172498         | 1.089366525 | 1.00                           |
|             | HFD     | 4619.983                                | 6684.69  | 50668.522      | 0.091180536                       | 0.13192984          | 0.691128983 | 0.63                           |
|             | GDM     | 4080.276                                | 8291.933 | 10346.811      | 0.394351071                       | 0.801399871         | 0.492077782 | 0.45                           |
|             | GDM+XOS | 5403.832                                | 5813.589 | 12129.347      | 0.445517141                       | 0.479299421         | 0.929517377 | 0.85                           |
| Replicate 2 | NC      | 4949.69                                 | 8315.095 | 7187.761       | 0.688627516                       | 1.156840774         | 0.595265598 | 1.00                           |
|             | HFD     | 2690.397                                | 7814.024 | 7279.054       | 0.369608056                       | 1.07349444          | 0.344303652 | 0.58                           |
|             | GDM     | 2058.326                                | 8378.418 | 7365.225       | 0.279465461                       | 1.137564433         | 0.245670006 | 0.41                           |
|             | GDM+XOS | 4033.518                                | 8233.125 | 7296.64        | 0.552791148                       | 1.12834469          | 0.489913368 | 0.82                           |
| Replicate 3 | NC      | 6235.154                                | 5558.347 | 7995.225       | 0.779859729                       | 0.695208327         | 1.121764078 | 1.00                           |
|             | HFD     | 4197.033                                | 6155.74  | 7431.225       | 0.564783464                       | 0.828361407         | 0.681808036 | 0.61                           |
|             | GDM     | 2651.376                                | 5981.79  | 7676.225       | 0.345401027                       | 0.779261942         | 0.443241237 | 0.40                           |
|             | GDM+XOS | 5607.619                                | 6208.619 | 8258.811       | 0.678986237                       | 0.751757002         | 0.903199085 | 0.81                           |

## 2. Raw pictures for Fig.5

The primary antibodies for occludin and ZO-1 are expensive. Therefore, the western blot gel containing the target protein were first cut into small pieces based on the position of markers before incubation with the primary antibody in order to save the costs.

### 2.1 Occludin (Fig.5 C)

#### Replicate 1

Original western blot gel picture for occludin (1)

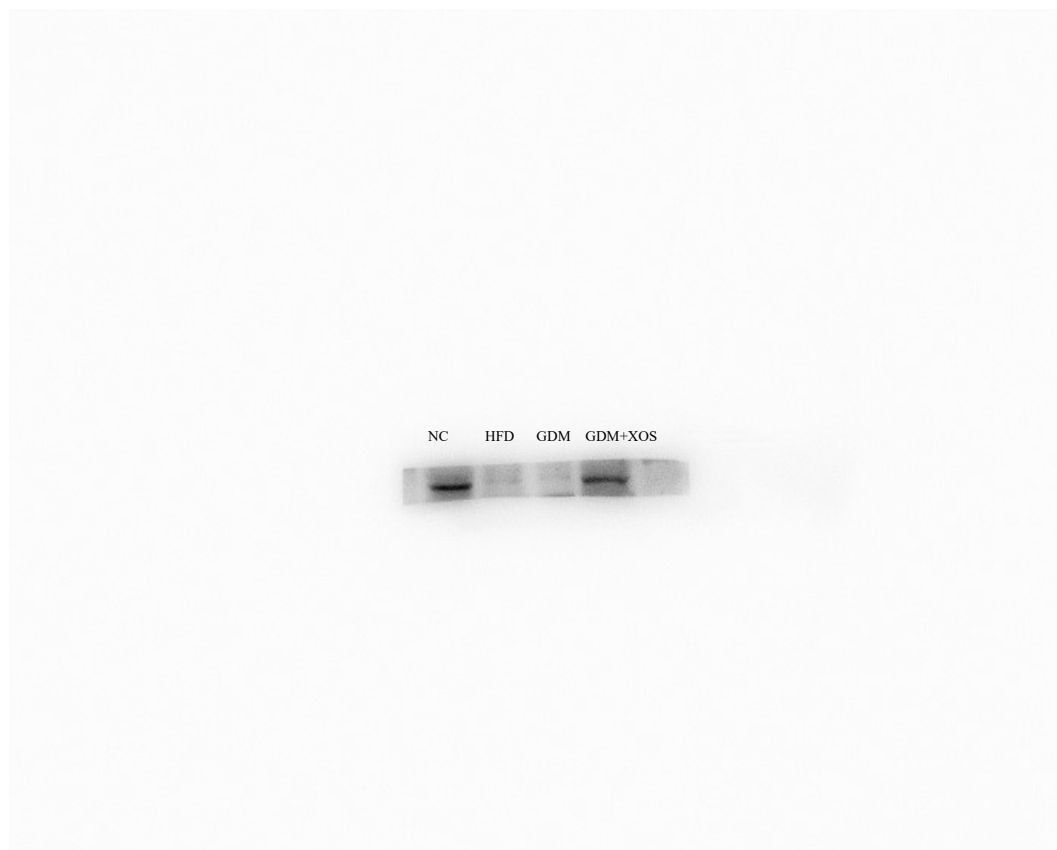

Cut blot picture for occludin (1)

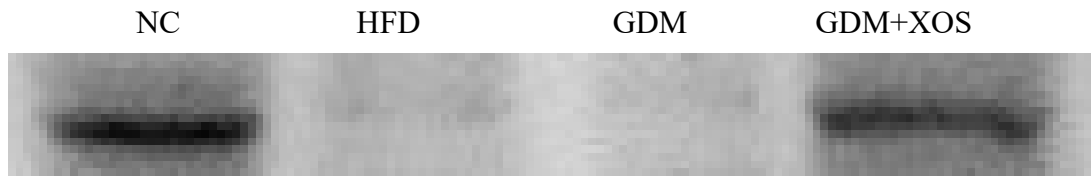

Plot of occludin picture (1) by using Image J software

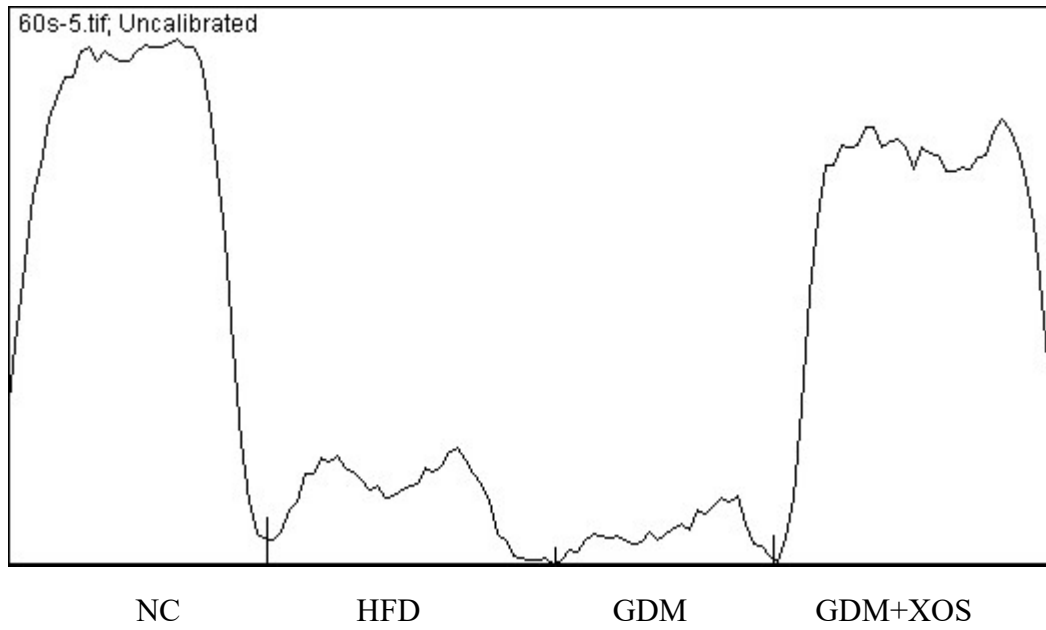

Original western blot gel picture for  $\beta$ -actin (1)

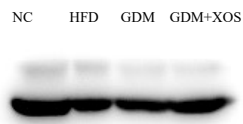

Cut blot picture for  $\beta$ -actin (1)

NC

HFD

GDM

GDM+XOS

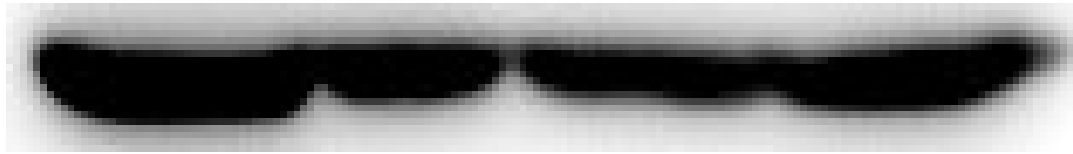

Plot of  $\beta$ -actin picture (1) by using Image J software

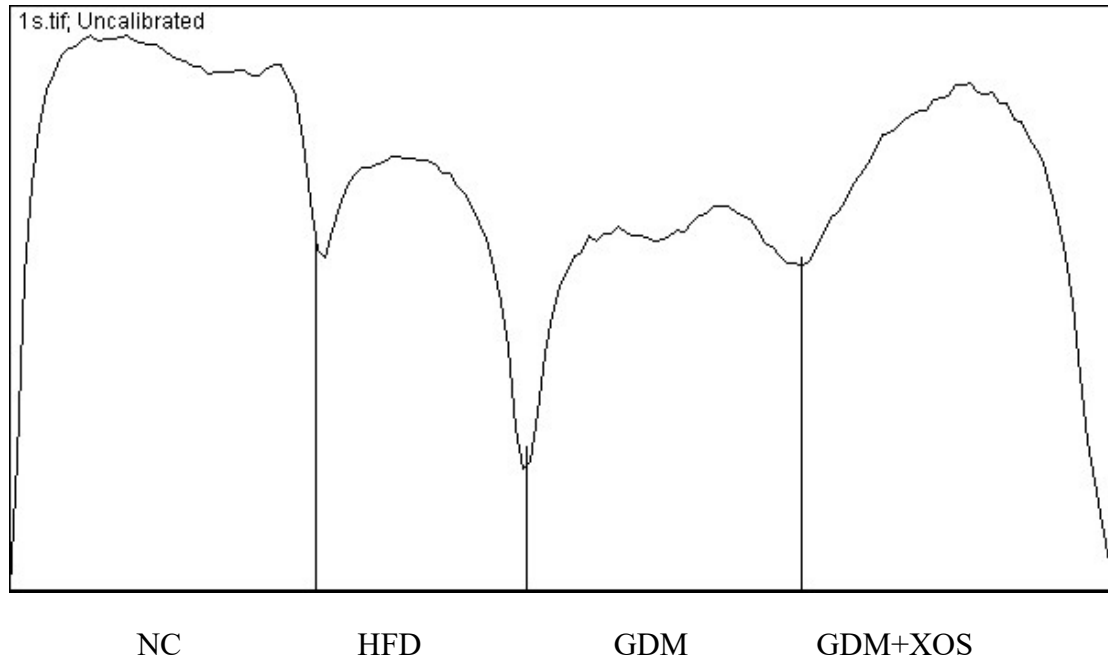

**Replicate 2**

Original western blot gel picture for occludin (2)

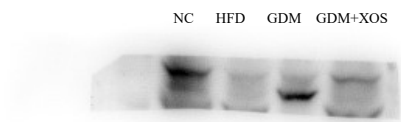

Cut blot picture for occludin (2)

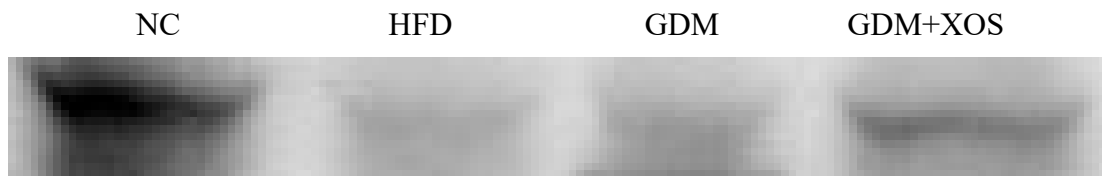

Plot of occludin picture (2) by using Image J software

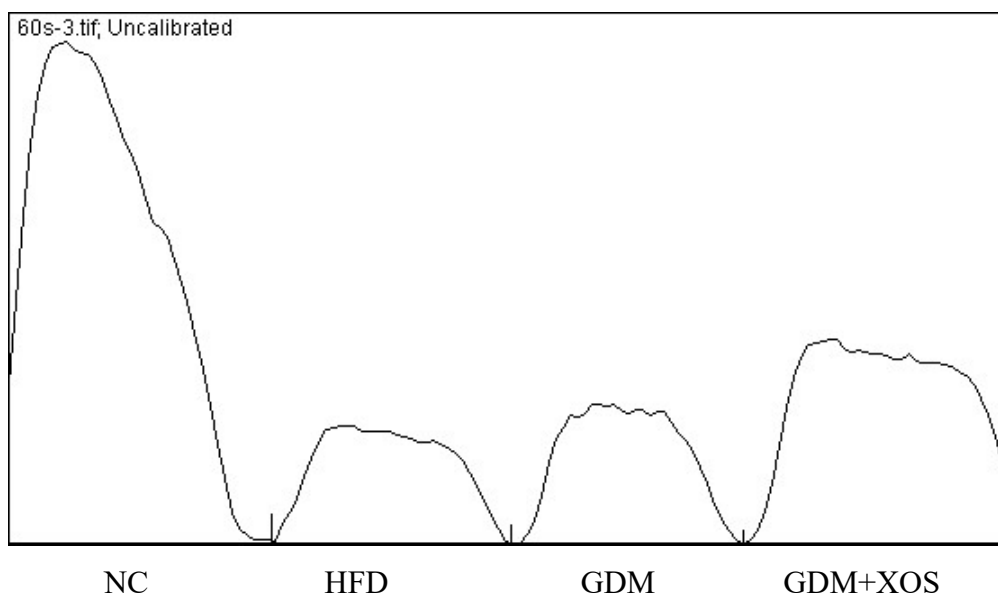

Original western blot gel picture for  $\beta$ -actin (2)

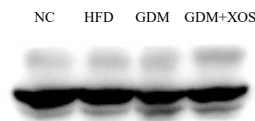

Cut blot picture for  $\beta$ -actin (2)

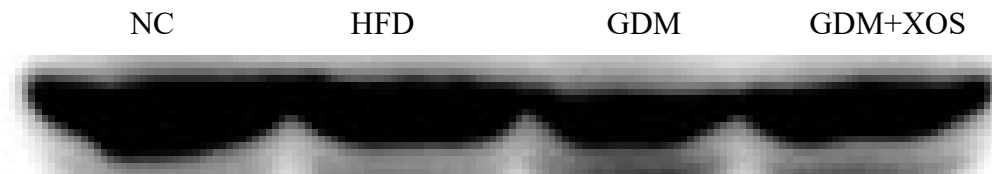

Plot of  $\beta$ -actin picture (2) by using Image J software



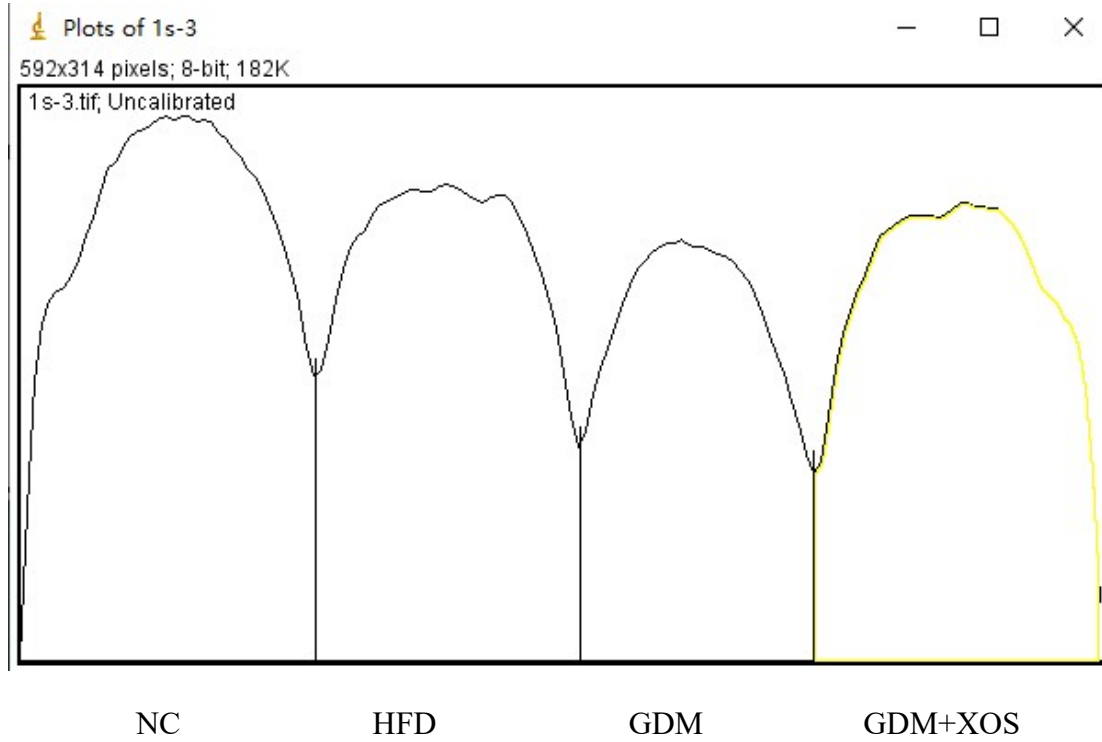

### Replicate 3

Original western blot gel picture for occludin (3)

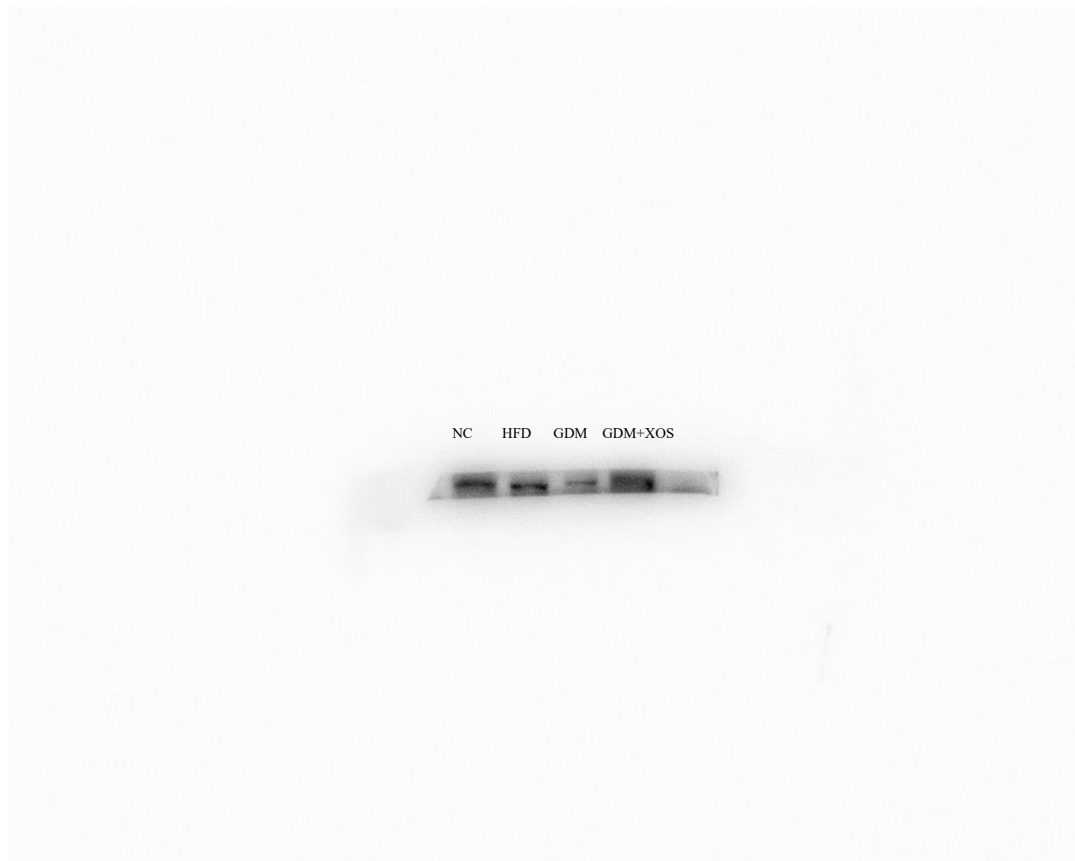

Cut blot picture for occludin (3)

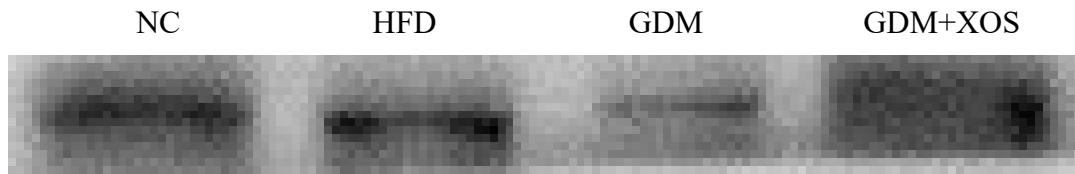

Plot of occludin picture (3) by using Image J software

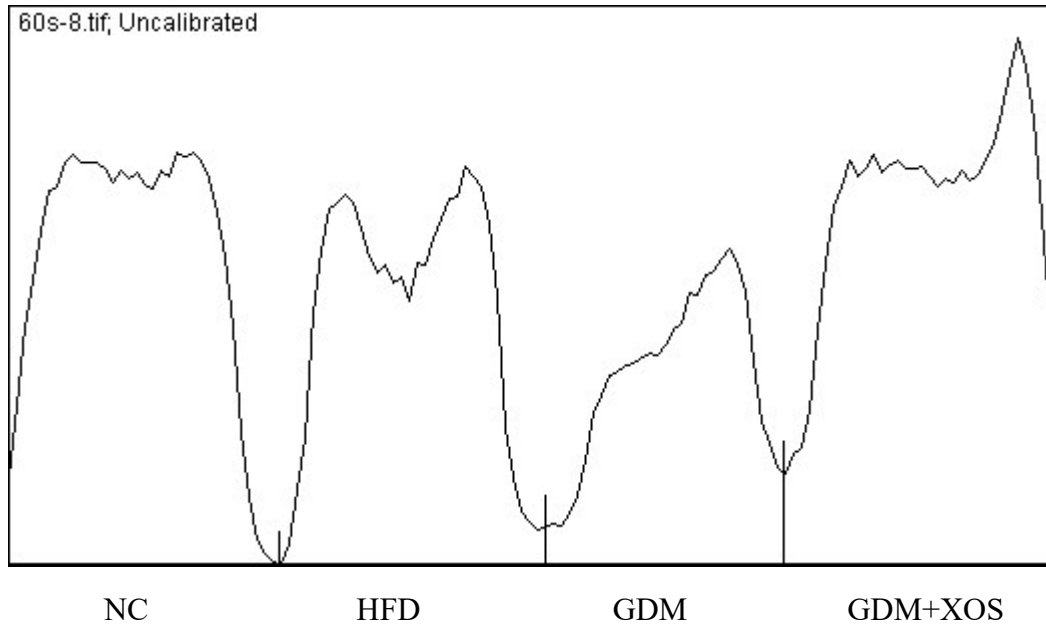

Original western blot gel picture for  $\beta$ -actin (3)

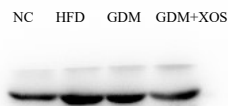

Cut blot picture for  $\beta$ -actin (3)

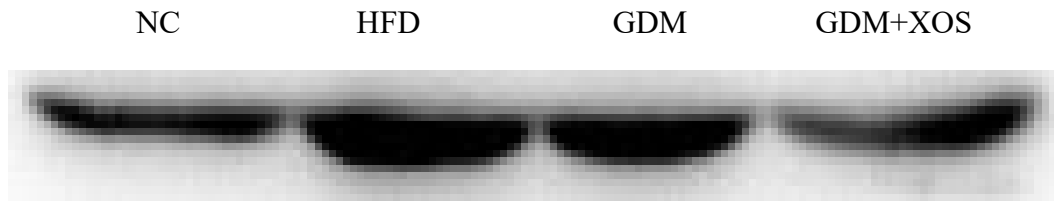

Plot of  $\beta$ -actin picture (3) by using Image J software

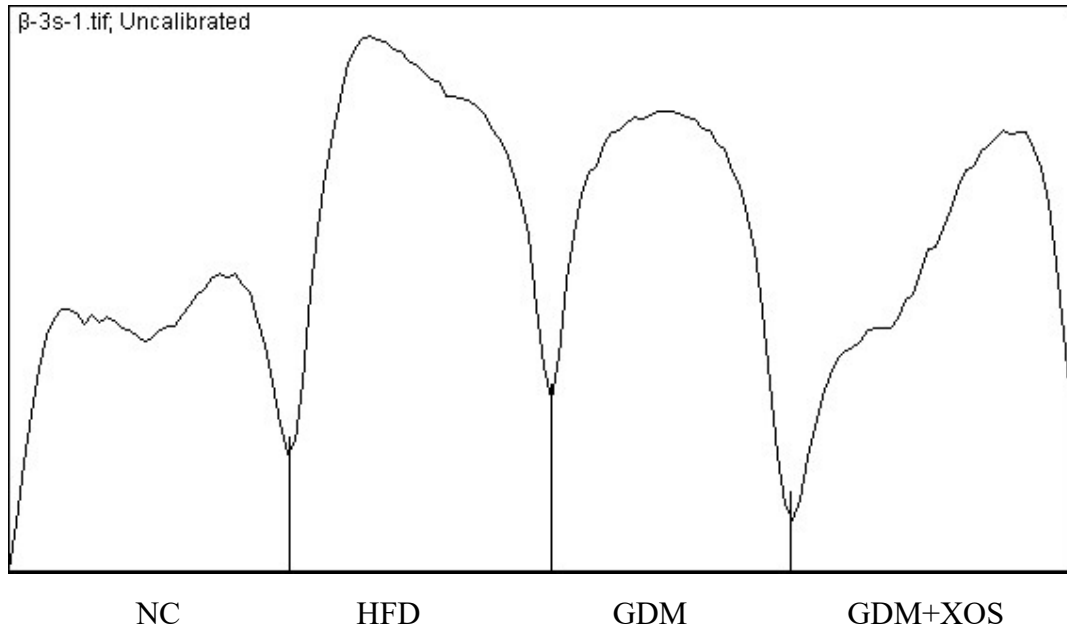

**The original grey value produced by Image J software and their relative ratio to  $\beta$ -actin or to the NC group**

| Groups  | Replicate 1 |                |                          |                                | Replicate 2 |                |                          |                                | Replicate 3 |                |                          |                                |
|---------|-------------|----------------|--------------------------|--------------------------------|-------------|----------------|--------------------------|--------------------------------|-------------|----------------|--------------------------|--------------------------------|
|         | occludin    | $\beta$ -actin | occludin/ $\beta$ -actin | Relative ratio to the NC group | occludin    | $\beta$ -actin | occludin/ $\beta$ -actin | Relative ratio to the NC group | occludin    | $\beta$ -actin | occludin/ $\beta$ -actin | Relative ratio to the NC group |
| NC      | 29174.953   | 32033.459      | 0.910764991              | <b>1.00</b>                    | 28798.51    | 31235.581      | 0.921977728              | <b>1.00</b>                    | 22841.146   | 20456.388      | 1.116577668              | <b>1.00</b>                    |
| HFD     | 9794.075    | 14740.752      | 0.664421666              | <b>0.73</b>                    | 9778.447    | 16755.246      | 0.583605099              | <b>0.63</b>                    | 21831.217   | 28321.024      | 0.770848434              | <b>0.69</b>                    |
| GDM     | 2440.154    | 10137.125      | 0.240714601              | <b>0.26</b>                    | 8391.054    | 30267.539      | 0.277229477              | <b>0.30</b>                    | 10046.246   | 29679.711      | 0.338488673              | <b>0.30</b>                    |
| GDM+XOS | 19825.024   | 39010.551      | 0.508196462              | <b>0.56</b>                    | 15510.933   | 30499.024      | 0.508571455              | <b>0.55</b>                    | 17456.51    | 27565.217      | 0.63328034               | <b>0.57</b>                    |

## 2.2 ZO-1 (Fig.5 D)

### Replicate 1

Original western blot gel picture for ZO-1 (1)

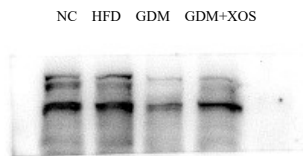

Cut blot picture for ZO-1 (1)

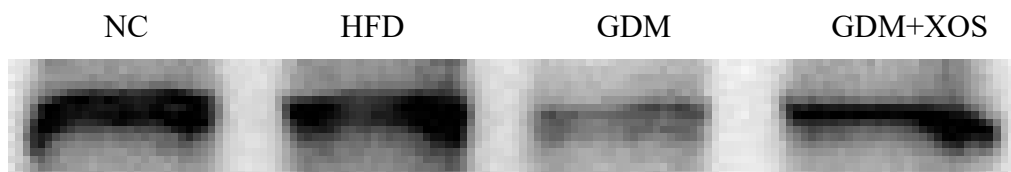

Plot of ZO-1 picture (1) by using Image J software

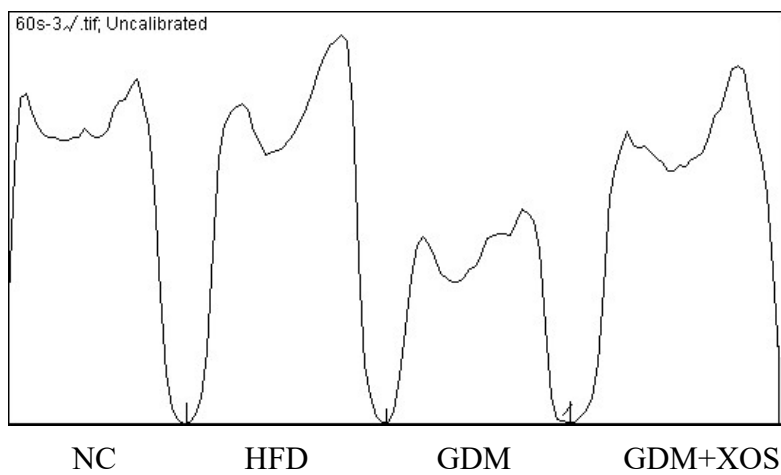

Original western blot gel picture for  $\beta$ -actin (1)

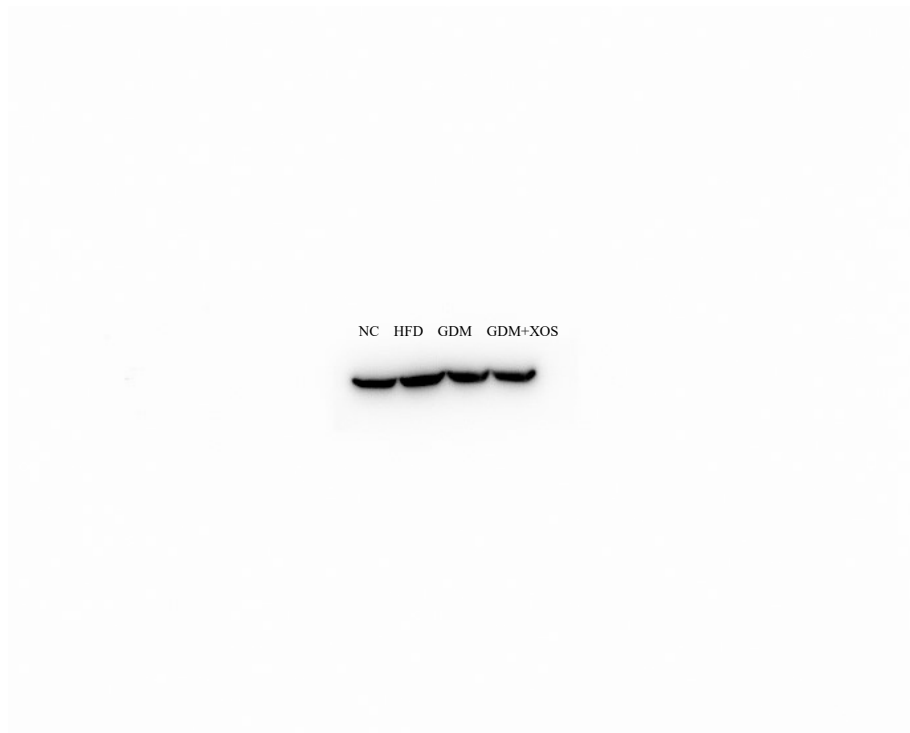

Cut blot picture for  $\beta$ -actin (1)

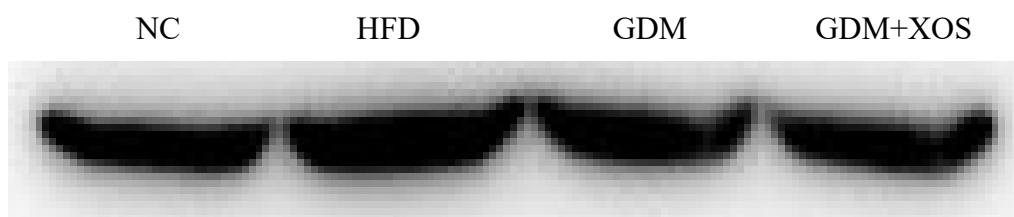

Plot of  $\beta$ -actin picture (1) by using Image J software

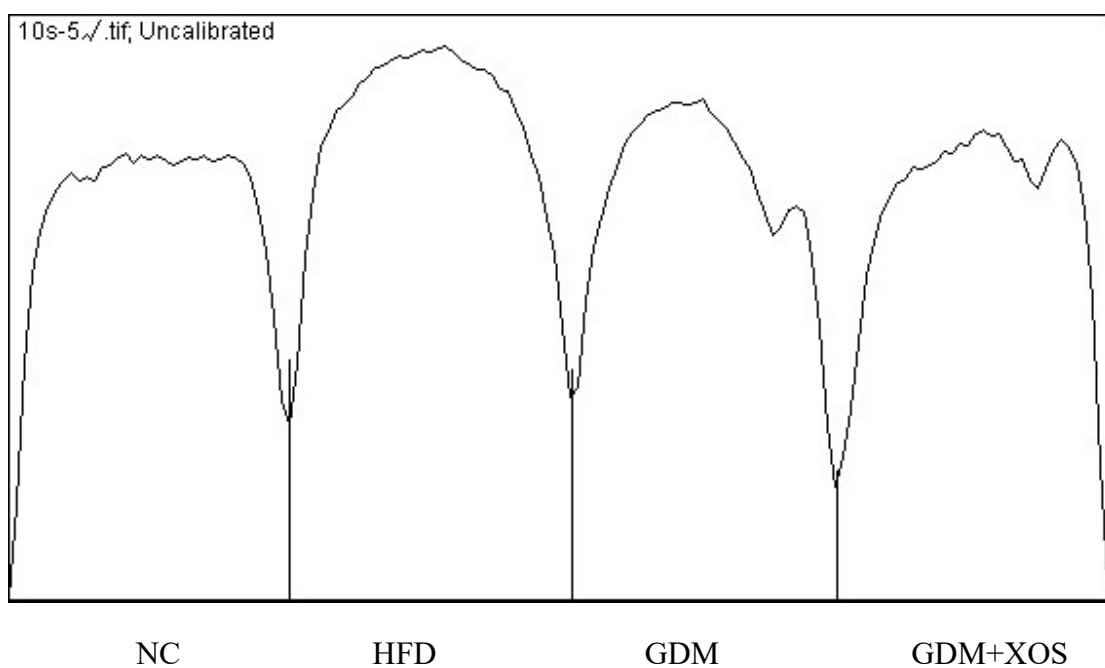

## Replicate 2

Original western blot gel picture for ZO-1 (2)

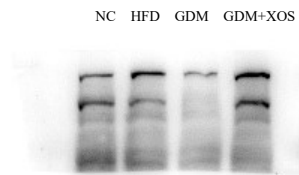

Cut blot picture for ZO-1 (2)

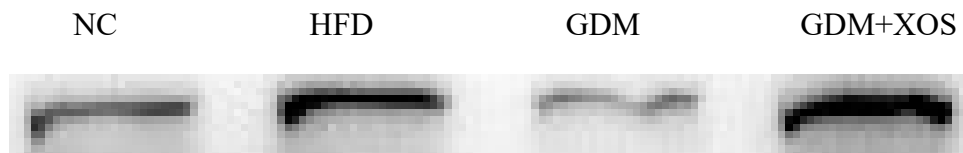

Plot of ZO-1 picture (2) by using Image J software

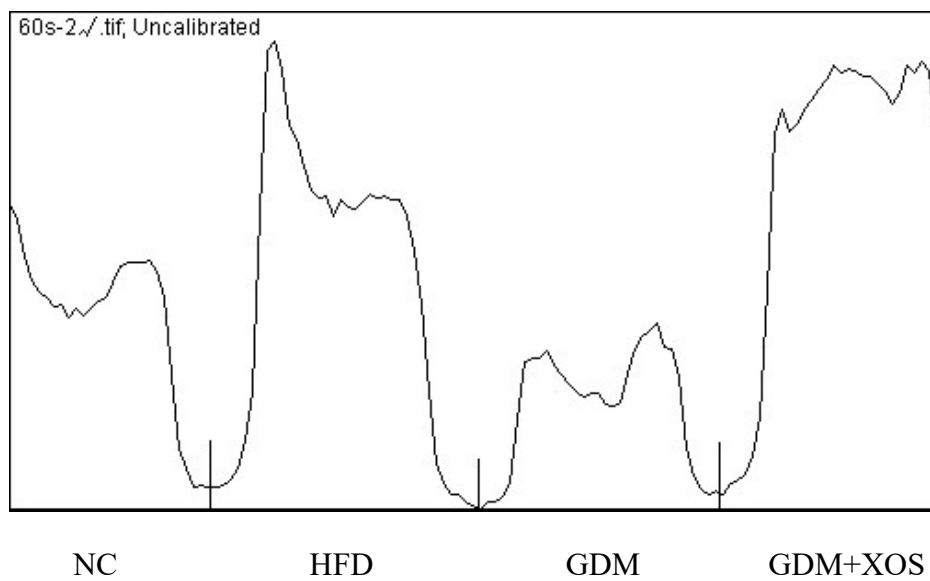

Original western blot gel picture for  $\beta$ -actin (2)

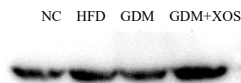

Cut blot picture for  $\beta$ -actin (2)

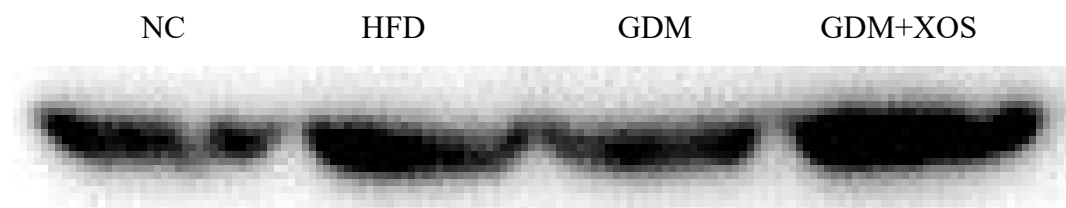

Plot of  $\beta$ -actin picture (2) by using Image J software

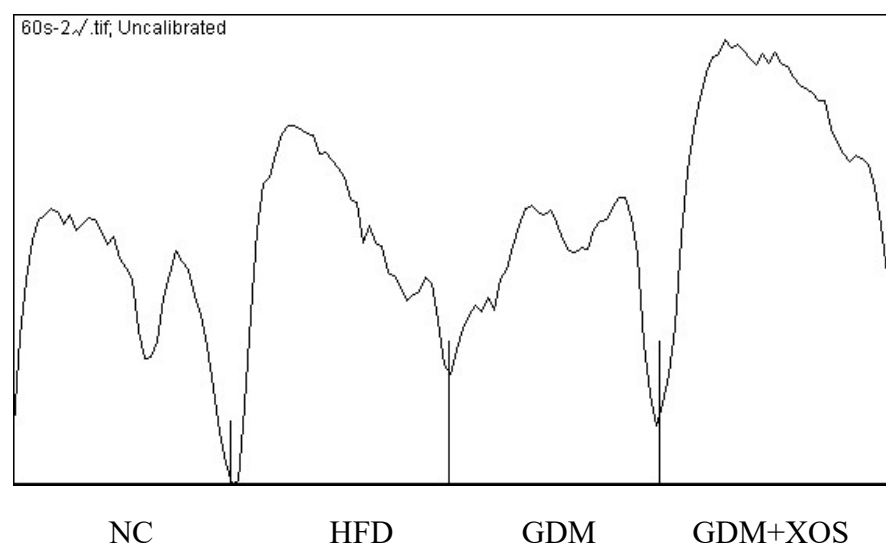

### Replicate 3

Original western blot gel picture for ZO-1 (3)

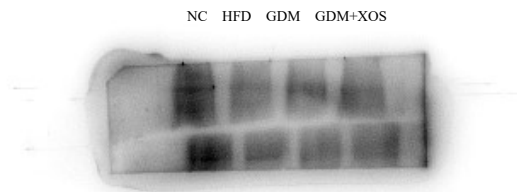

Cut blot picture for ZO-1 (3)

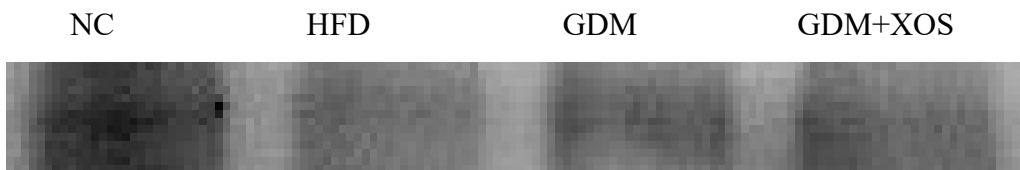

Plot of ZO-1 picture (3) by using Image J software

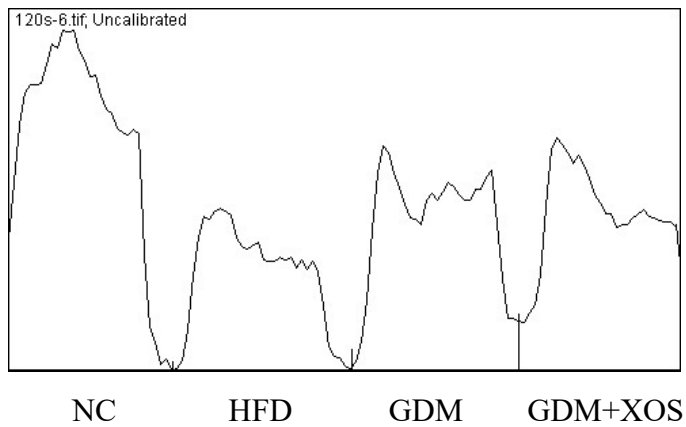



Original western blot gel picture for  $\beta$ -actin (3)

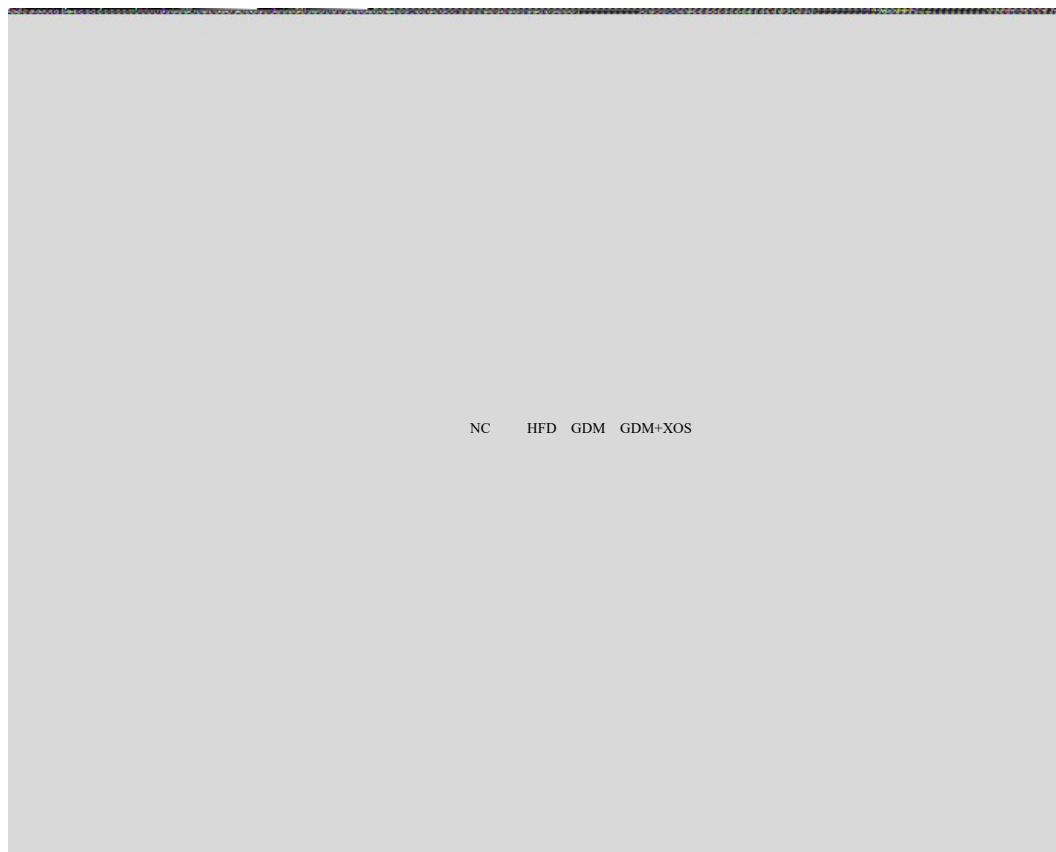

Cut blot picture for  $\beta$ -actin (3)

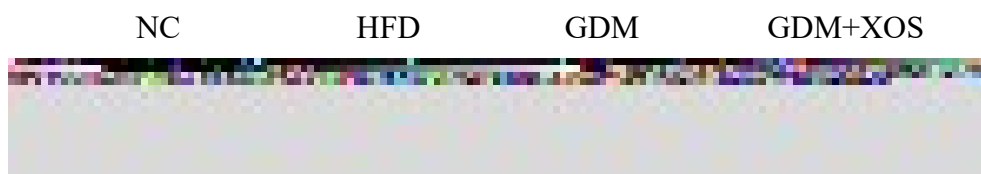

Plot of  $\beta$ -actin picture (3) by using Image J software

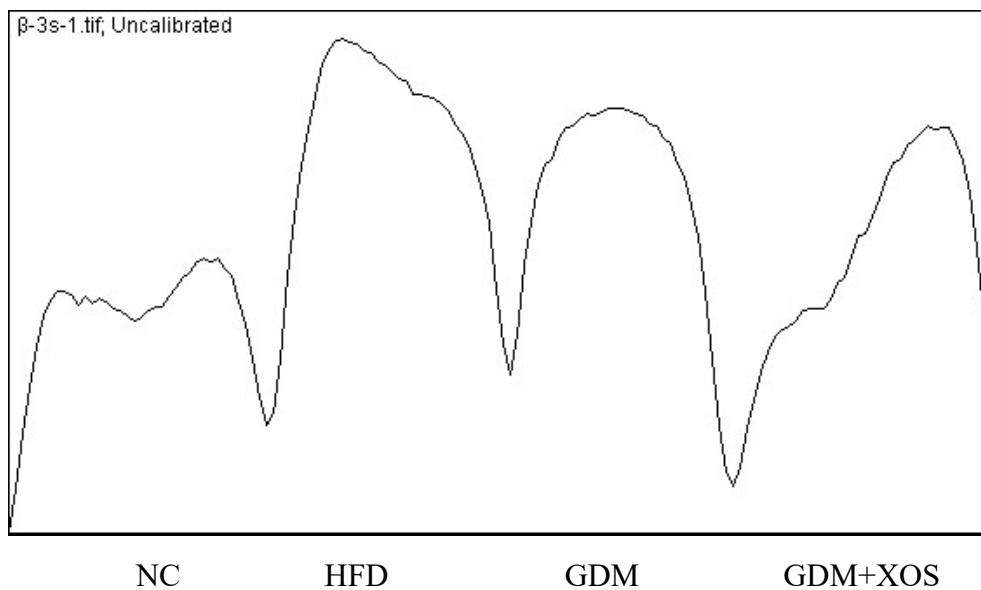

| The original grey value produced by Image J software and their relative ratio to $\beta$ -actin or to the NC group |             |                |                      |                                |             |                |                      |                                |             |                |                      |                                |
|--------------------------------------------------------------------------------------------------------------------|-------------|----------------|----------------------|--------------------------------|-------------|----------------|----------------------|--------------------------------|-------------|----------------|----------------------|--------------------------------|
| Groups                                                                                                             | Replicate 1 |                |                      |                                | Replicate 2 |                |                      |                                | Replicate 3 |                |                      |                                |
|                                                                                                                    | ZO-1        | $\beta$ -actin | ZO-1/ $\beta$ -actin | Relative ratio to the NC group | ZO-1        | $\beta$ -actin | ZO-1/ $\beta$ -actin | Relative ratio to the NC group | ZO-1        | $\beta$ -actin | ZO-1/ $\beta$ -actin | Relative ratio to the NC group |
| NC                                                                                                                 | 24161.175   | 27802.903      | 0.869016268          | 1.00                           | 14235.347   | 16755.752      | 0.849579714          | 1.00                           | 18922.66    | 16077.803      | 1.176943143          | 1.00                           |
| HFD                                                                                                                | 23545.095   | 34237.024      | 0.687708575          | 0.79                           | 15522.853   | 23027.388      | 0.674103941          | 0.79                           | 17617.246   | 20052.853      | 0.878540625          | 0.75                           |
| GDM                                                                                                                | 11776.418   | 28417.146      | 0.414412411          | 0.48                           | 7320.66     | 18911.974      | 0.387091268          | 0.46                           | 12592.317   | 24578.418      | 0.512332283          | 0.44                           |
| GDM+XOS                                                                                                            | 18492.803   | 31790.681      | 0.581705154          | 0.67                           | 20531.66    | 34866.823      | 0.588859501          | 0.69                           | 15357.61    | 20136.752      | 0.762665697          | 0.65                           |
