# Supplementary material for: Xylooligosaccharides ameliorate insulin resistance by increasing Akkermansia muciniphila and improving intestinal barrier dysfunction in gestational diabetes mellitus mice
Source: Royal Society of Chemistry journal article supplement (doi:10.1039/d3fo04681h), 2024-01-01
Supplement: d3fo04681h2.pdf [file d3fo04681h2.pdf]

**Xylooligosaccharides (XOS) Ameliorate Insulin Resistance by  
Increasing *Akkermansia Muciniphila* and Improving  
Intestinal Barrier Dysfunction in Gestational Diabetes  
Mellitus (GDM) Mice**

**Supplementary materials**

**Fig.S1**

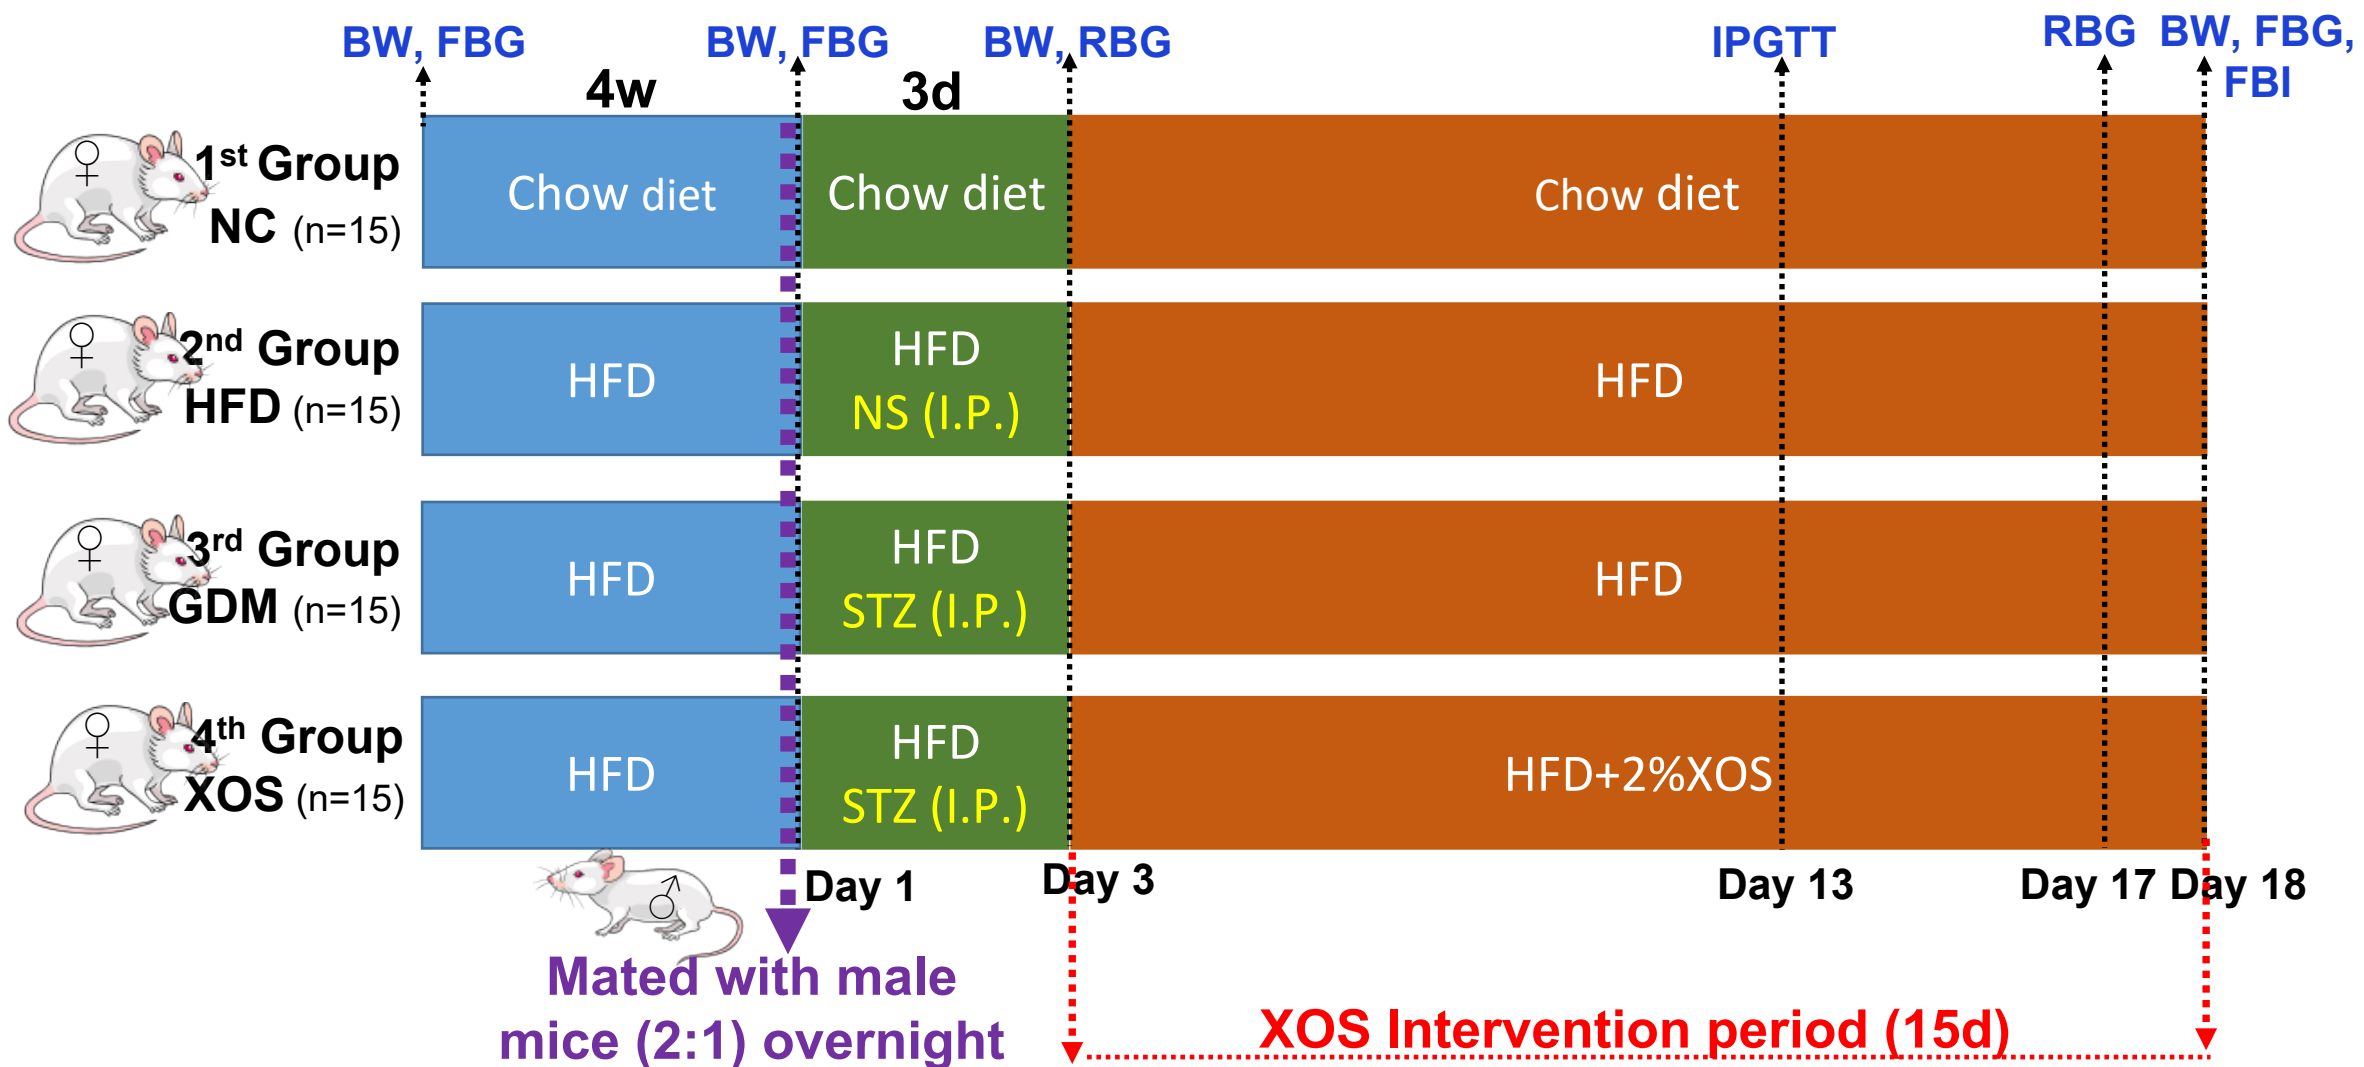

## Fig.S1 The animal experiment protocol

Abbreviations: BW, body weight; FBG, fasting blood glucose; RBG, random blood glucose; IPGTT, intraperitoneal glucose tolerance test; FBI, fasting blood insulin; HFD, high fat diet; NC, normal control; GDM, gestational diabetes mellitus; XOS, xylooligosaccharides; STZ, streptozotocin; I.P., intraperitoneal injection.
